# Supplementary material
Source: Springer Nature journal article supplement (https://www.springermedizin.de/resource/supplementary/12985_2009_553_MOESM6_ESM.pdf/9608436)

**A**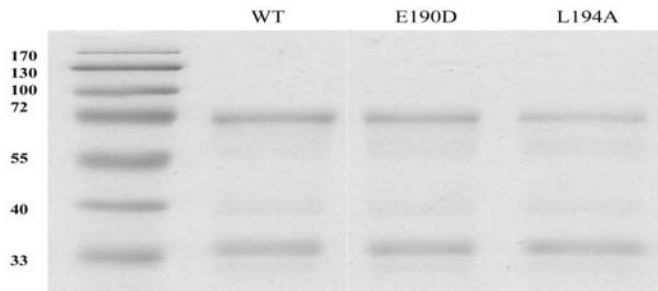**B**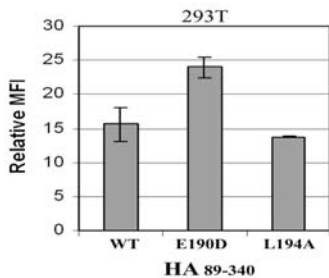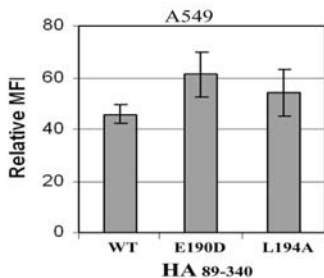

Supplement: MOESM6 [file 9608436]
